# Supplementary material
Source: PubMed Central journal article supplement (PMC2689810)

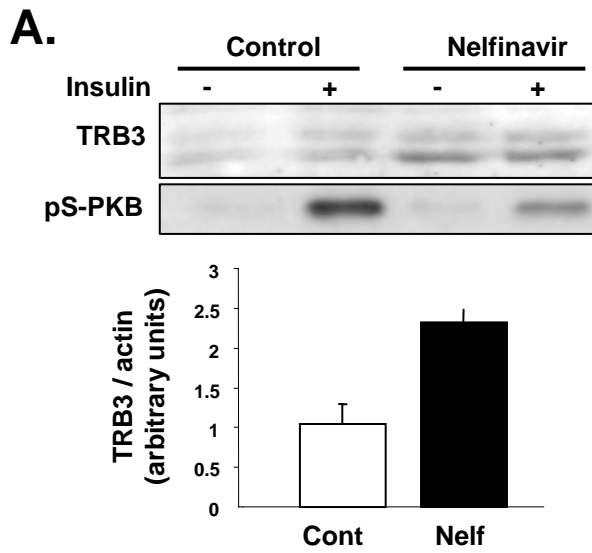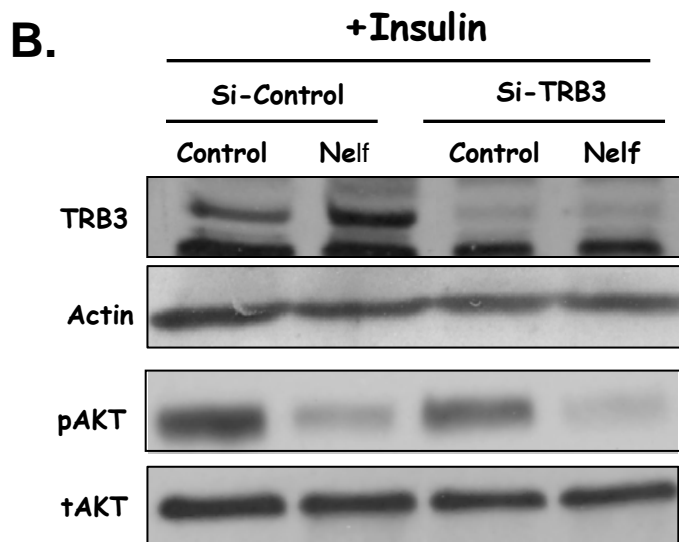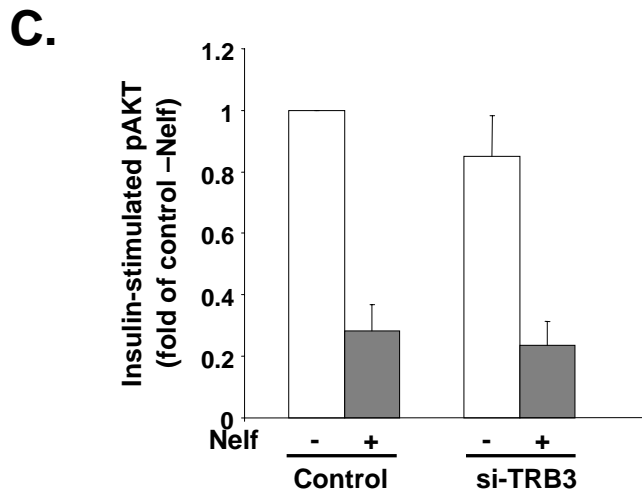

Supplement: en.2008-1205_1.pdf [file en.2008-1205_1.pdf]
